# Supplementary material for: Homoeologous duplicated regions are involved in quantitative resistance of Brassica napus to stem canker
Source: PubMed Central journal article supplement (PMC4082613; doi:10.1186/1471-2164-15-498), 2014-06-19

Additional file 5-Figure S4

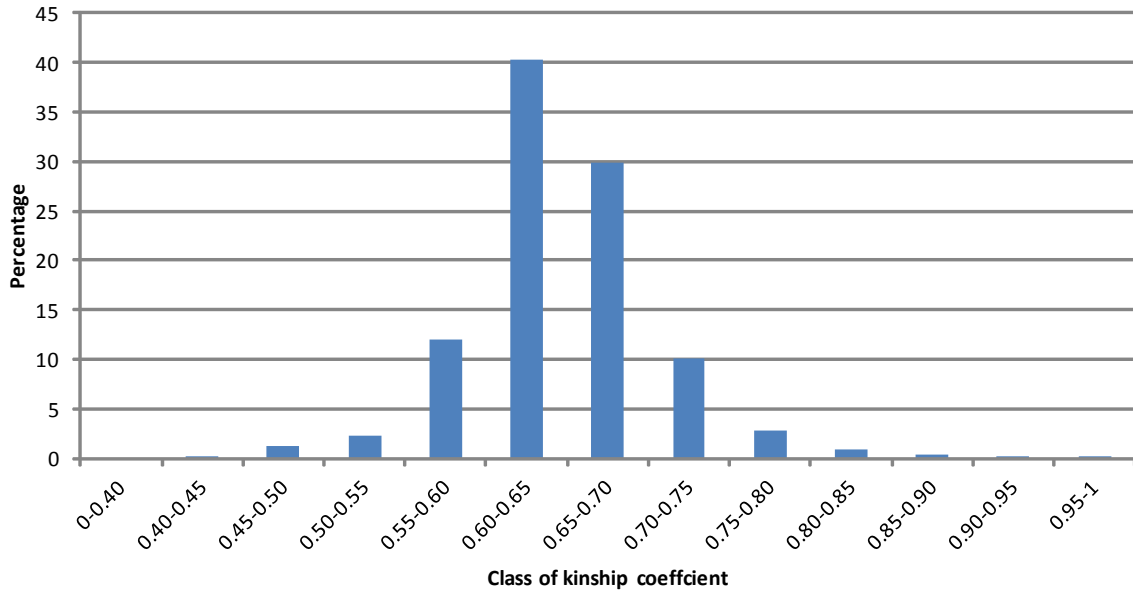

Supplement: 12864_2013_6190_MOESM5_ESM.pdf [file 12864_2013_6190_MOESM5_ESM.pdf]
